# Supplementary material for: A machine learning approach to the digitalization of bank customers: Evidence from random and causal forests
Source: PubMed Central journal article supplement (PMC7593085; doi:10.1371/journal.pone.0240362), 2020-10-28
Supplement: pone.0240362.s001.pdf [file pone.0240362.s001.pdf]

## Supporting information

### S1 Appendix. Sample Design and Data Collection Process

|                                     |              |                                                                                                                                                                                                                                                                                                                                                                                                                                                                                                                                                                     |
|-------------------------------------|--------------|---------------------------------------------------------------------------------------------------------------------------------------------------------------------------------------------------------------------------------------------------------------------------------------------------------------------------------------------------------------------------------------------------------------------------------------------------------------------------------------------------------------------------------------------------------------------|
| Sample design                       | Landline     | <ul style="list-style-type: none"> <li>Phase 1: the municipality. Stratified randomized selection using the size of the municipality and the region.</li> <li>Phase 2: household. Randomized selection using the Irismedia directory recoded and debugged by IMOP.</li> <li>Phase 3: individual. Selection employing sex and age quotas.</li> </ul> <p>The application selects the household member who is relatively less represented in the sample at the time of the call and establishes a postponement if the chosen person is not at home at that moment.</p> |
|                                     | Mobile phone | Simple random selection using the mobile phone database generated by IMOP from the data provided by each mobile operator. This database was tested before beginning the survey in order to detect inactive lines.                                                                                                                                                                                                                                                                                                                                                   |
| Technique                           |              | All the interviews are conducted through the CATI system using a computer.                                                                                                                                                                                                                                                                                                                                                                                                                                                                                          |
| Sample error                        |              | $\pm 1.8\%$ for a confidence level of 95.5%.                                                                                                                                                                                                                                                                                                                                                                                                                                                                                                                        |
| % mobile phone interviews           |              | 40.4%                                                                                                                                                                                                                                                                                                                                                                                                                                                                                                                                                               |
| % landline (fixed phone) interviews |              | 59.6%                                                                                                                                                                                                                                                                                                                                                                                                                                                                                                                                                               |
| Questionnaire duration (on average) |              | 21.5 minutes                                                                                                                                                                                                                                                                                                                                                                                                                                                                                                                                                        |
| Denial rate                         |              | 14.7% of the people who took the telephone call declined to answer the questionnaire.                                                                                                                                                                                                                                                                                                                                                                                                                                                                               |
| Not completion                      |              | 0.9% of the people who began answering the questionnaire decided to end the survey before its completion.                                                                                                                                                                                                                                                                                                                                                                                                                                                           |
| Data availability                   |              | All data are available at Funcas Foundation (Caballero de Gracia, 28 28013 Madrid). Contact details: odf@funcas.es                                                                                                                                                                                                                                                                                                                                                                                                                                                  |

### S2 Appendix. List of Survey Questionnaire Variables

|                                     |                                                                                                |                                                                                                            |                          |                      |                               |                            |                      |                            |                           |                        |               |
|-------------------------------------|------------------------------------------------------------------------------------------------|------------------------------------------------------------------------------------------------------------|--------------------------|----------------------|-------------------------------|----------------------------|----------------------|----------------------------|---------------------------|------------------------|---------------|
| Socio-demographic characteristics   | Age                                                                                            | Financial status                                                                                           | N° bank accounts         | Financial activities | Online/Mobile check balance   | Cash                       | Home                 |                            |                           |                        |               |
|                                     | Gender                                                                                         |                                                                                                            | N° banks                 |                      | Online/Mobile communication   |                            | Pocket               |                            |                           |                        |               |
|                                     | Province                                                                                       |                                                                                                            | Savings bank account     |                      | Online/Mobile pay bills       |                            | Annual cash payments |                            |                           |                        |               |
|                                     | Employed worker                                                                                |                                                                                                            | Current bank account     |                      | Mobile web browser            |                            | Nonbank payment user |                            |                           |                        |               |
|                                     | Employment situation                                                                           |                                                                                                            | N° Online bank accounts  |                      | Mobile purchase               |                            | Google Wallet        |                            |                           |                        |               |
|                                     | Sector activity                                                                                |                                                                                                            | N° Online only bank acc. |                      | In-app purchase               |                            | Amazon payments      |                            |                           |                        |               |
|                                     | Unemployment period                                                                            |                                                                                                            | Consciousness            |                      | QR code                       |                            | Paypal               |                            |                           |                        |               |
|                                     | Full-time job                                                                                  |                                                                                                            | Main bank                |                      | SMS                           |                            | Web account          |                            |                           |                        |               |
|                                     | Permanent job contract                                                                         |                                                                                                            | Credit/Debit card holder |                      | Wave mobile                   |                            | Other                |                            |                           |                        |               |
|                                     | Social profile                                                                                 |                                                                                                            | Monthly revenue          |                      | How many times do you . . . ? |                            | N° bank branch check | How often do you . . . . ? | Online bank communication | Where do you get cash? | ATM cash      |
| Household employees                 |                                                                                                | N° check credit weekly                                                                                     | Online bank complaint    | Bank branch cash     |                               |                            |                      |                            |                           |                        |               |
| Household monthly rev.              |                                                                                                | N° check monthly bank acc.                                                                                 | Phone complaint          | Family cash          |                               |                            |                      |                            |                           |                        |               |
| Workplace province                  |                                                                                                | N° check monthly credit                                                                                    | Freq bank branch check   | Cashback cash        |                               |                            |                      |                            |                           |                        |               |
| Facebook user                       |                                                                                                | N° check prepaid                                                                                           | Freq check bank account  | Never cash           |                               |                            |                      |                            |                           |                        |               |
| Twitter user                        |                                                                                                | N° check prepaid weekly                                                                                    | Freq check credit        | N° where cash        |                               |                            |                      |                            |                           |                        |               |
| Twitter/Facebook bank communication |                                                                                                | N° check weekly bank acc.                                                                                  | Freq check prepaid       | Times withdrawal     |                               |                            |                      |                            |                           |                        |               |
| Twitter/Facebook bank complaint     |                                                                                                | N° check weekly credit                                                                                     | Freq online              | Victim fraud         |                               |                            |                      |                            |                           |                        |               |
| Responsible for?                    |                                                                                                | Household financial                                                                                        | Bank branch check        | Freq online check    |                               | How often do you . . . . ? | Been                 |                            | Where do you get cash?    |                        | Digital media |
|                                     |                                                                                                | Monthly bills                                                                                              | Check monthly prepaid    | Freq phone complaint |                               |                            |                      |                            |                           |                        |               |
|                                     | Household savings                                                                              | Check weekly prepaid                                                                                       | Freq use online          |                      |                               |                            |                      |                            |                           |                        |               |
|                                     | Household shopping                                                                             | N° check weekly credit                                                                                     | Freq withdrawal          |                      |                               |                            |                      |                            |                           |                        |               |
|                                     |                                                                                                |                                                                                                            |                          |                      |                               |                            |                      |                            |                           |                        |               |
| <b>Customers' perceptions</b>       |                                                                                                |                                                                                                            |                          |                      |                               |                            |                      |                            |                           |                        |               |
| Customers'                          | Acceptance                                                                                     | ATM withdrawal, bank account number, credit card, debit card, mobile banking, online banking, prepaid card |                          |                      |                               |                            |                      |                            |                           |                        |               |
|                                     | Convenience                                                                                    |                                                                                                            |                          |                      |                               |                            |                      |                            |                           |                        |               |
|                                     | Cost                                                                                           |                                                                                                            |                          |                      |                               |                            |                      |                            |                           |                        |               |
|                                     | Difficulty                                                                                     |                                                                                                            |                          |                      |                               |                            |                      |                            |                           |                        |               |
|                                     | Easiness                                                                                       |                                                                                                            |                          |                      |                               |                            |                      |                            |                           |                        |               |
|                                     | Quality                                                                                        |                                                                                                            |                          |                      |                               |                            |                      |                            |                           |                        |               |
|                                     | Safety                                                                                         |                                                                                                            |                          |                      |                               |                            |                      |                            |                           |                        |               |
| Risk pay                            | App, email, online, personally, SMS                                                            |                                                                                                            |                          |                      |                               |                            |                      |                            |                           |                        |               |
| Value                               | Confidentiality, easiness, protect. losses, speed deduction, speed payment, speed registration |                                                                                                            |                          |                      |                               |                            |                      |                            |                           |                        |               |

**S3 Appendix. Dictionary**

| Dimension                                | Classification                           | Definition                                                                                                                                                                                                                            |
|------------------------------------------|------------------------------------------|---------------------------------------------------------------------------------------------------------------------------------------------------------------------------------------------------------------------------------------|
| Adoption of Digital Banking              | Non users                                | Individuals who over the course of the year have not adopted any kind of financial digitalization, including those who are not even digitalized consumers (i.e., they do not use the internet)                                        |
|                                          | Occasional users                         | Individuals who conducted online banking activities, but not on a monthly basis.                                                                                                                                                      |
|                                          | Frequent users                           | Individuals who conducted online financial activities every month over the course of the year.                                                                                                                                        |
| Degree of use of Digital Banking         | No digital users                         | Individuals who are outside of the digitalization process (i.e., who have no access to the internet)                                                                                                                                  |
|                                          | Non-users of digital financial services  | Individuals who are frequent internet users but do not conduct any financial activity online                                                                                                                                          |
|                                          | Incipient users                          | Individuals who perform some but not all online financial activities at least once a month.                                                                                                                                           |
|                                          | Diversified users                        | Individuals that carry out all financial activities online at least once a month.                                                                                                                                                     |
| Adoption of Banks' Payment Instruments   | Non-debit card users                     | Individuals who do not use on a monthly basis a debit card to make payments.                                                                                                                                                          |
|                                          | Debit card users                         | Individuals who use on a monthly basis a debit card to make payments.                                                                                                                                                                 |
|                                          | Non-credit card users                    | Individuals who do not use on a monthly basis a credit card to make payments.                                                                                                                                                         |
|                                          | Credit card users                        | Individuals who use on a monthly basis a credit card to make payments.                                                                                                                                                                |
| Adoption of Non-Bank Payment Instruments | No digital users                         | Individuals who are outside of the digitalization process (i.e., who have no access to the internet).                                                                                                                                 |
|                                          | Non-users of non-banking payment methods | Individuals who do not use at least once a month a payment method which is provided by a non-bank institution (e.g. Amazon Pay, PayPal, Google Wallet, Apple Pay, etc.) were classified as non-users of non-bank payment instruments. |
|                                          | Users of non-banking payment methods     | Individuals who use at least once a month a payment method which is provided by a non-bank institution (e.g. Amazon Pay, PayPal, Google Wallet, Apple Pay, etc.) were classified as non-users of non-bank payment instruments.        |

**S4 Appendix. Alternative models performance in terms of predictive accuracy**

|                                                             | Out-of-sample accuracy (70/30% split) |                                          |                                          |            |             |                                      |        |
|-------------------------------------------------------------|---------------------------------------|------------------------------------------|------------------------------------------|------------|-------------|--------------------------------------|--------|
|                                                             | Adoption of online banking            | Diversity of digital use: online banking | Diversity of digital use: mobile banking | Debit card | Credit card | Adoption of Non-bank payment methods |        |
| <b>Random forest</b>                                        | 88.41%                                | 70.11%                                   | 70.01%                                   | 85.00%     | 74.89%      | 76.14%                               |        |
| <b>Extreme Gradient Boosting</b>                            | 84.99%                                | 68.82%                                   | 67.85%                                   | 84.79%     | 73.51%      | 75.91%                               |        |
| <b>K-Nearest Neighbor</b>                                   | <b>Euclidean</b>                      | 84.92%                                   | 63.41%                                   | 63.97%     | 80.60%      | 64.75%                               | 74.94% |
|                                                             | <b>Manhattan</b>                      | 82.71%                                   | 60.53%                                   | 62.97%     | 80.27%      | 65.96%                               | 72.73% |
|                                                             | <b>Chebyshev</b>                      | 65.85%                                   | 50.55%                                   | 50.67%     | 79.71%      | 58.76%                               | 66.19% |
| <b>Supportive Vector Machine (SVM)</b>                      | <b>Linear</b>                         | 83.54%                                   | 69.00%                                   | 66.70%     | 82.75%      | 71.14%                               | 74.15% |
|                                                             | <b>Radial</b>                         | 84.58%                                   | 67.36%                                   | 66.27%     | 82.11%      | 72.63%                               | 74.48% |
|                                                             | <b>Sigmoid</b>                        | 83.43%                                   | 68.89%                                   | 66.16%     | 79.23%      | 65.60%                               | 73.49% |
|                                                             | <b>Polynomial</b>                     | 80.32%                                   | 58.60%                                   | 61.56%     | 79.98%      | 67.84%                               | 72.95% |
| <b>Bayesian Networks</b>                                    | <b>Naive Bayes</b>                    | 58.52%                                   | 39.55%                                   | 43.52%     | 67.16%      | 56.25%                               | 53.30% |
|                                                             | <b>Tan HSCP</b>                       | 58.98%                                   | 41.48%                                   | 43.18%     | 65.91%      | 55.68%                               | 52.61% |
|                                                             | <b>Tan CL</b>                         | 34.55%                                   | 25.34%                                   | 28.64%     | 53.86%      | 49.09%                               | 35.23% |
|                                                             | <b>Tan HC</b>                         | 57.39%                                   | 40.45%                                   | 41.02%     | 65.57%      | 57.95%                               | 52.16% |
|                                                             | <b>AODE</b>                           | 58.07%                                   | 42.39%                                   | 42.95%     | 65.68%      | 57.50%                               | 53.86% |
|                                                             | <b>KBD</b>                            | 56.82%                                   | 39.89%                                   | 44.66%     | 66.70%      | 58.30%                               | 51.59% |
|                                                             | <b>FSSJ</b>                           | 86.48%                                   | 66.36%                                   | 63.98%     | 84.43%      | 72.16%                               | 70.91% |
| <b>Artificial Neural Networks: Extreme learning machine</b> | <b>BESJ</b>                           | 81.14%                                   | 66.00%                                   | 60.91%     | 75.00%      | 64.55%                               | 66.93% |
|                                                             | <b>Sigmoid</b>                        | 58.48%                                   | 40.24%                                   | 45.12%     | 79.82%      | 54.55%                               | 64.86% |
|                                                             | <b>Radial Basis</b>                   | 41.22%                                   | 28.60%                                   | 29.49%     | 59.20%      | 48.78%                               | 45.68% |
|                                                             | <b>Sine</b>                           | 37.65%                                   | 26.50%                                   | 30.27%     | 52.99%      | 51.77%                               | 37.92% |
|                                                             | <b>Hard-Limit</b>                     | 56.29%                                   | 39.58%                                   | 44.24%     | 79.82%      | 54.10%                               | 64.86% |
|                                                             | <b>Symm. Hard-Limit</b>               | 58.48%                                   | 39.91%                                   | 44.35%     | 78.38%      | 54.32%                               | 61.31% |
|                                                             | <b>Satlins</b>                        | 73.49%                                   | 60.31%                                   | 61.86%     | 82.59%      | 69.73%                               | 73.17% |
|                                                             | <b>Tan-Sigmoid</b>                    | 58.48%                                   | 40.24%                                   | 45.79%     | 77.83%      | 54.21%                               | 64.86% |
|                                                             | <b>Triangular Basis</b>               | 82.18%                                   | 65.63%                                   | 67.96%     | 84.15%      | 74.61%                               | 76.05% |
|                                                             | <b>Rectifier Linear Unit</b>          | 82.18%                                   | 65.41%                                   | 61.75%     | 83.26%      | 74.84%                               | 75.84% |
| <b>Linear Function</b>                                      | 82.44%                                | 65.96%                                   | 67.74%                                   | 84.04%     | 74.72%      | 75.94%                               |        |
| <b>Logit</b>                                                | 79.27%                                | 55.01%                                   | 59.57%                                   | 84.23%     | 70.62%      | 73.46%                               |        |

S4 Appendix reports the predicted accuracy for all the models (machine learning algorithm and logit) employed in examining the digitalization of bank customers.

**S5 Appendix. Features importance by the Extreme Gradient Boosting algorithm**

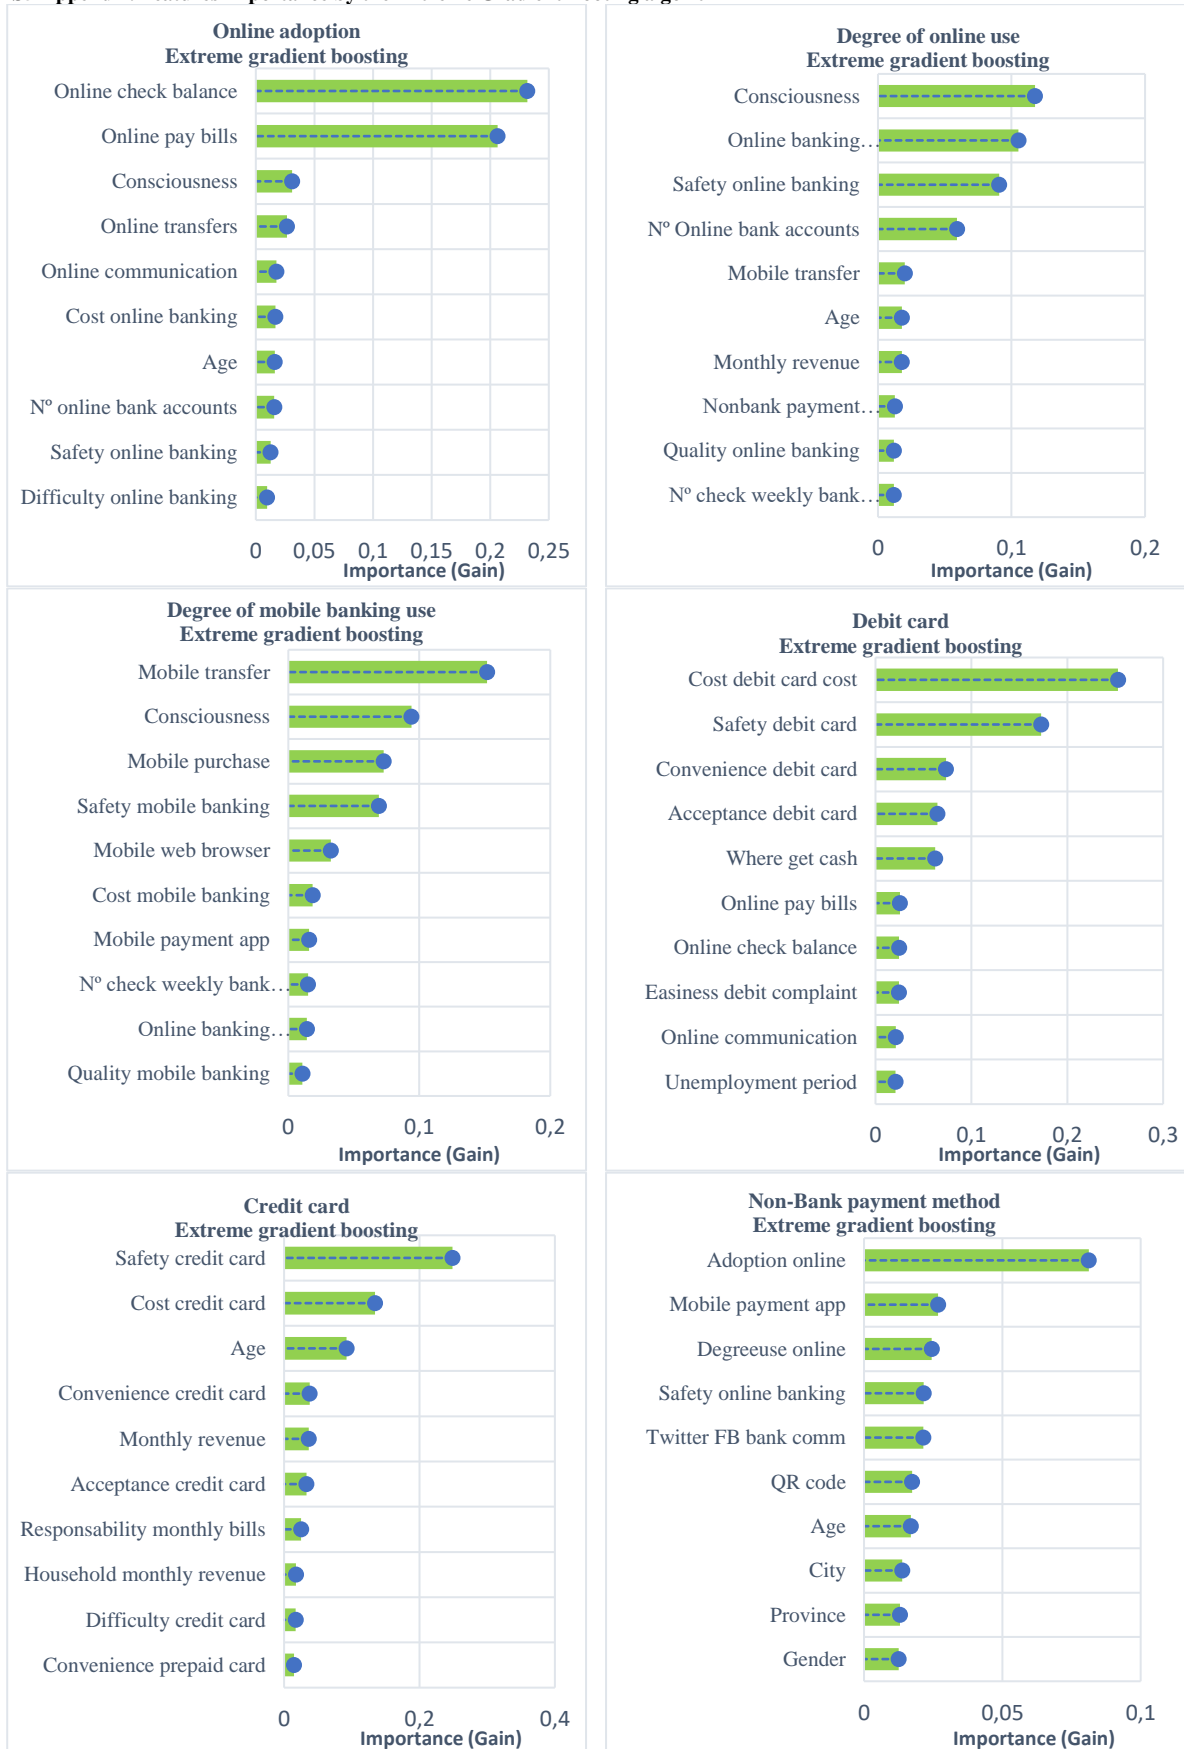

These figures provide the most important features predicting bank customers' digitalization based on the Extreme gradient boosting algorithm. The relative importance of each feature is computed using the relative contribution of the corresponding feature to the model calculated by taking each feature's contribution for each tree in the model (Gain). A higher score suggests the feature is more important in the boosted tree prediction.

S6 Appendix. Bayesian Networks.

Figure S6.1 Bayesian Network: Adoption of digital banking

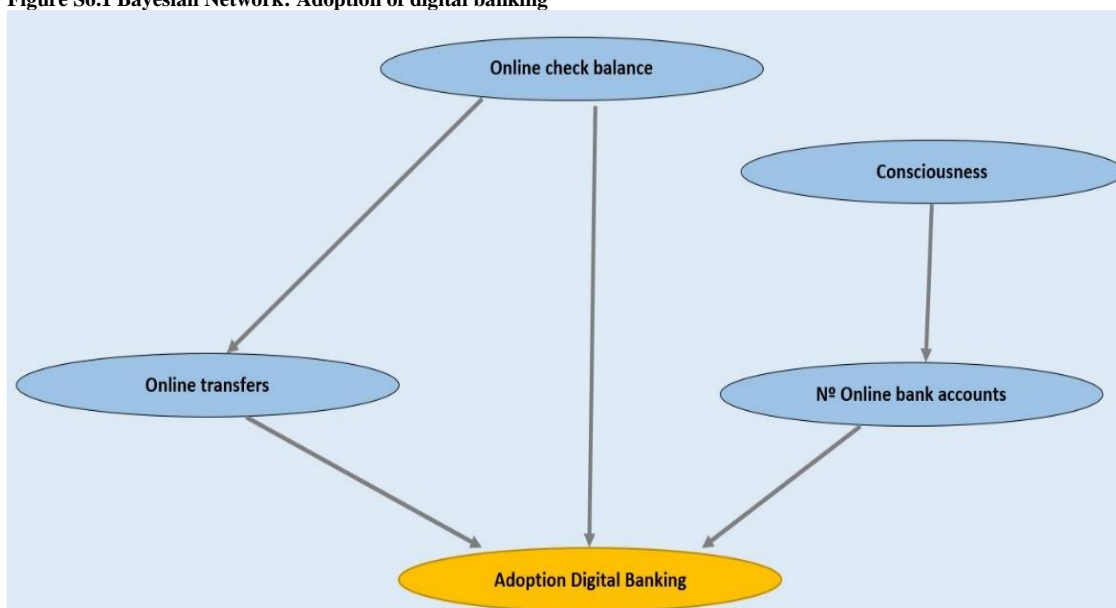

Figure S6.2 Bayesian Network: Diversity of use - Online banking

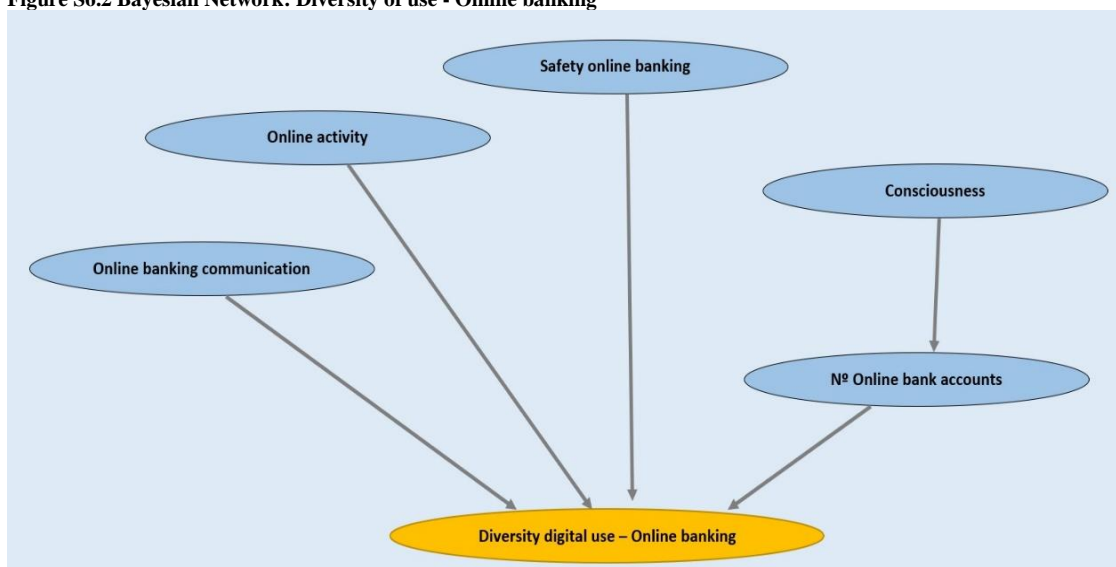

Figure S6.3 Bayesian Network: Diversity of use - Mobile banking

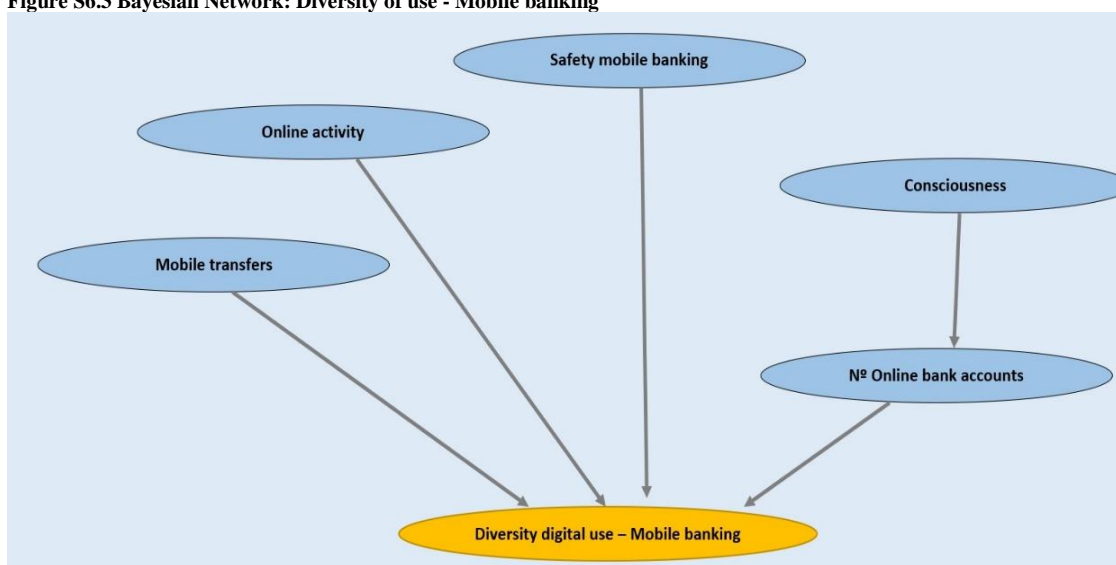

Figure S6.4 Bayesian Network: Debit card use

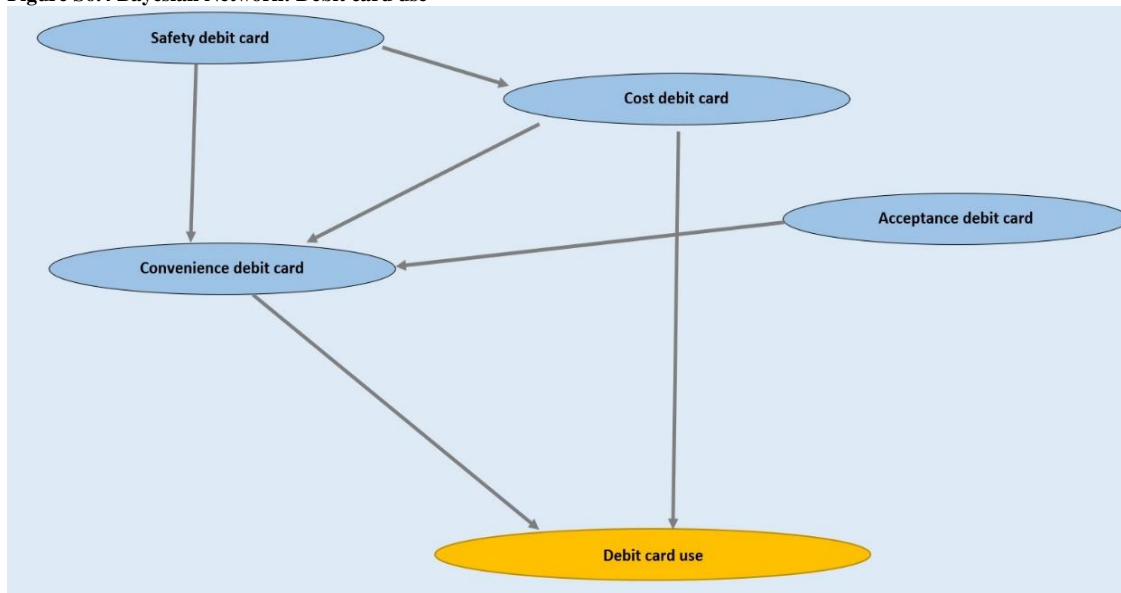

Figure S6.5 Bayesian Network: Credit card use

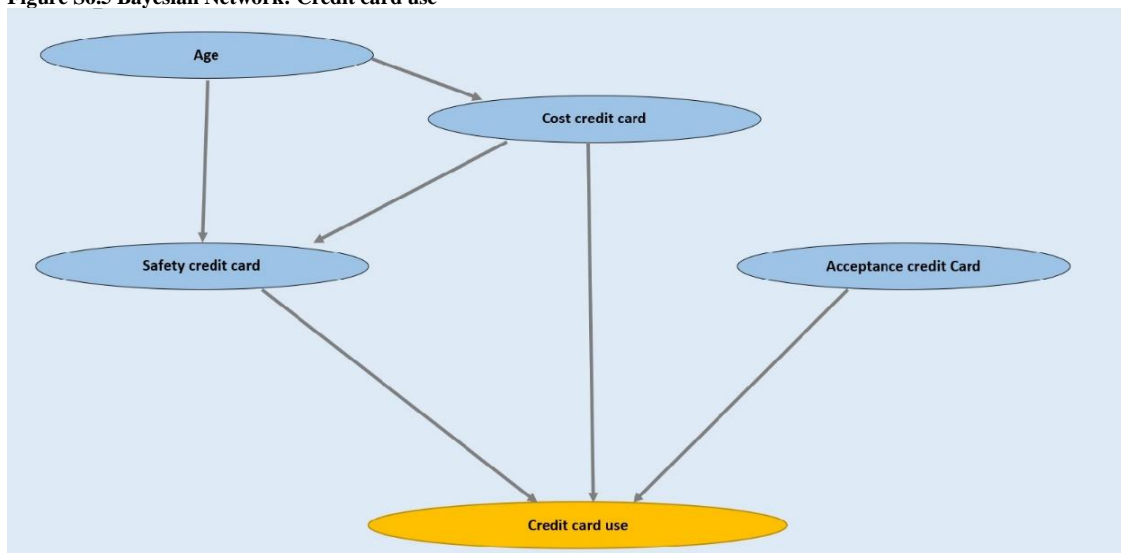

Figure S6.5 Bayesian Network: Use of non-bank payment instruments

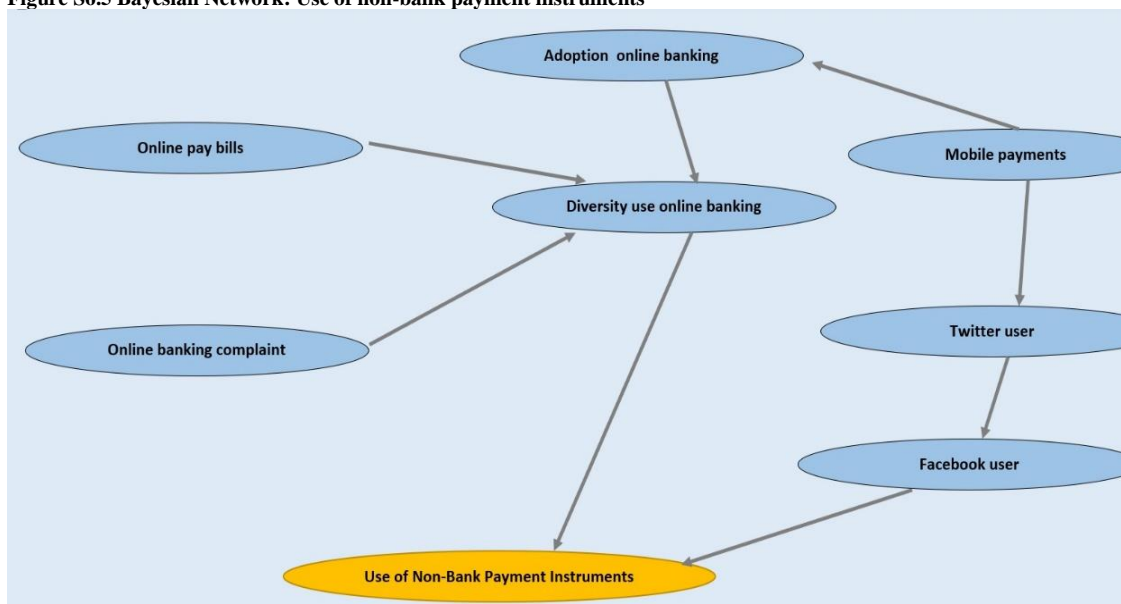

These figures plot the Bayesian network, based on the hill-climbing algorithm, for the subset of features with the largest discriminant power for each of the dimensions considered.
